# Supplementary material
Source: publisher site journal article supplement (https://www.dovepress.com/article/430024)
Supplement: Supplementary file 1 [file get_supplementary_file.php]

Appendix 1. Maternal and paternal nighttime sleep duration at each time point postpartum after deducting 30 min for child night waking (N=188)

|  | **Maternal nighttime sleep duration** | | **Paternal nighttime sleep duration** | | |
| --- | --- | --- | --- | --- | --- |
|  | **N** | **Mean (SD; range)** | **N** | **Mean (SD; range)** |
| **3 m** | 172 | 8h18 (1h08; 4h30-12h00) | 168 | 7h41 (0h56; 4h04-10h00) |
| **18 m** | 141 | 8h03 (0h50; 5h24-10h39) | 137 | 7h46 (0h50; 5h17-9h47) |
| **24 m** | 168 | 8h15 (0h48; 4h30-10h43) | 167 | 7h59 (0h44; 4h17-9h43) |
| **36 m** | 179 | 8h14 (0h45; 5h21-11h09) | 167 | 7h58 (0h43; 5h00-10h15) |

*m = months

**Legend for Appendix**

Appendix 2. Sleep multi-trajectories from 3 to 36 months postpartum in the SEPAGES cohort after deducting 30 min for child night waking. A) Maternal sleep multi-trajectories (M1-M3). 1: M1 (N=40, 21.4%), 2: M2 (N=55, 29.3%), 3: M3 (N=93, 49.4%). Lines represent mean night and weekend daytime sleep duration and subjective sleep loss trajectories.; B) Paternal sleep multi-trajectories (F1-F3). 1: F1 (N=71, 37.6%), 2: F2 (N=35, 18.9%), 3: F3 (N=82, 43.5%). Lines represent mean night and weekend daytime sleep duration and subjective sleep loss trajectories.; C) Couple sleep multi-trajectories (C1-C3). M: maternal, F: paternal, C1 (N=60, 31.8%), C2 (N=43, 22.9%) and C3 (N=85, 45.3). Lines represent mean night and weekend daytime sleep duration and subjective sleep loss trajectories.

**Appendix 2A**

|  |  |  |  |  |  |  |  |  |  |  |  |
| --- | --- | --- | --- | --- | --- | --- | --- | --- | --- | --- | --- |
| Nighttime sleep duration (hours) | | | | Weekend daytime sleep duration (hours) | | | | Subjective sleep loss (prevalence) | | | |
| |  | | --- | |  |  |  |  |  |  |  |  |  |  |  |
|  |  |  |  |  |  |  |  |  |  |  |  |
|  |  |  |  |  |  |  |  |  |  |  |  |
|  |  |  |  |  |  |  |  |  |  |  |  |
|  |  |  |  |  |  |  |  |  |  |  |  |
|  |  |  |  |  |  |  |  |  |  |  |  |
|  |  |  |  |  |  |  |  |  |  |  |  |
|  |  |  |  |  |  |  |  |  |  |  |  |
|  |  |  |  |  |  |  |  |  |  |  |  |
|  |  |  |  |  |  |  |  |  |  |  |  |
|  |  |  |  |  |  |  |  |  |  |  |  |
|  |  |  |  |  |  |  |  |  |  |  |  |
|  |  |  |  |  |  |  |  |  |  |  |  |
|  |  |  |  |  |  |  |  |  |  |  |  |
|  |  |  |  |  |  |  |  |  |  |  |  |
|  |  |  |  |  |  |  |  |  |  |  |  |
|  |  |  |  |  |  |  |  |  |  |  |  |
|  | Child age (month) | |  |  | Child age (month) | |  |  | Child age (month) | |  |
|  |  |  |  |  |  |  |  |  |  |  |  |

**Appendix 2B**

|  |  |  |  | |  |  |  |  |  |  |  |  |
| --- | --- | --- | --- | --- | --- | --- | --- | --- | --- | --- | --- | --- |
| Nighttime sleep duration (hours) | | | | Weekend daytime sleep duration (hours) | | | |  | Subjective sleep loss (prevalence) | | |  |
| |  | | --- | |  |  |  | |  |  |  |  |  |  |  |  |
|  |  |  |  | |  |  |  |  |  |  |  |  |
|  |  |  |  | |  |  |  |  |  |  |  |  |
|  |  |  |  | |  |  |  |  |  |  |  |  |
|  |  |  |  | |  |  |  |  |  |  |  |  |
|  |  |  |  | |  |  |  |  |  |  |  |  |
|  |  |  |  | |  |  |  |  |  |  |  |  |
|  |  |  |  | |  |  |  |  |  |  |  |  |
|  |  |  |  | |  |  |  |  |  |  |  |  |
|  |  |  |  | |  |  |  |  |  |  |  |  |
|  |  |  |  | |  |  |  |  |  |  |  |  |
|  |  |  |  | |  |  |  |  |  |  |  |  |
|  |  |  |  | |  |  |  |  |  |  |  |  |
|  |  |  |  | |  |  |  |  |  |  |  |  |
|  |  |  |  | |  |  |  |  |  |  |  |  |
|  |  |  |  | |  |  |  |  |  |  |  |  |
|  |  |  |  | |  |  |  |  |  |  |  |  |
|  | Child age (month) | |  | |  | Child age (month) | |  |  | Child age (month) | |  |
|  |  |  |  | |  |  |  |  |  |  |  |  |

**Appendix 2C**

| Nighttime sleep duration (hours) | | | | |  | Weekend daytime sleep duration (hours) | | | |  | Subjective sleep loss (prevalence) | | |  |  |  |
| --- | --- | --- | --- | --- | --- | --- | --- | --- | --- | --- | --- | --- | --- | --- | --- | --- |
| |  | | --- | |  |  | |  | | |  |  |  |  |  |  | | | |  |
|  |  | |  | |  | |  |  |  |  |  |  |  |  |  |  |
|  |  | |  | |  | |  |  |  |  |  |  |  |  |  |  |
|  |  | |  | |  | |  |  |  |  |  |  |  |  |  |  |
|  |  | |  | |  | |  |  |  |  |  |  |  |  |  |  |
|  |  | |  | |  | |  |  |  |  |  |  |  |  |  |  |
|  |  | |  | |  | |  |  |  |  |  |  |  |  |  |  |
|  |  | |  | |  | |  |  |  |  |  |  |  |  |  |  |
|  |  | |  | |  | |  |  |  |  |  |  |  |  |  |  |
|  |  | |  | |  | |  |  |  |  |  |  |  |  |  |  |
|  |  | |  | |  | |  |  |  |  |  |  |  |  |  |  |
|  |  | |  | |  | |  |  |  |  |  |  |  |  |  |  |
|  |  | |  | |  | |  |  |  |  |  |  |  |  |  |  |
|  |  | |  | |  | |  |  |  |  |  |  |  |  |  |  |
|  |  | |  | |  | |  |  |  |  |  |  |  |  |  |  |
|  |  | |  | |  | |  |  |  |  |  |  |  |  |  |  |
|  |  | |  | |  | |  |  |  |  |  |  |  |  |  |  |
|  |  | |  | |  | |  |  |  |  |  |  |  |  |  |  |
|  |  | |  | |  | |  |  |  |  |  |  |  |  |  |  |
|  |  | |  | |  | |  |  |  |  |  |  |  |  |  |  |
|  |  | |  | |  | |  |  |  |  |  |  |  |  |  |  |
|  |  | |  | |  | |  |  |  |  |  |  |  |  |  |  |
|  |  | |  | |  | |  |  |  |  |  |  |  |  |  |  |
|  | Child age (month) | | | |  | | Child age (month) | |  |  | Child age (month) | |  |  |  |  |

Appendix 3. Unadjusted and adjusted multinomial logistic regression for couple sleep multi-trajectory groups with maternal weekday nap at 3 months postpartum included (N=188, C1 was the reference)

|  | | |  | **Unadjusted model** | | **Adjusted model** | |
| --- | --- | --- | --- | --- | --- | --- | --- |
|  | | |  | **C2** a **(N=52)** | **C3** a **(N=81)** | **C2** a **(N=52)** | **C3** a **(N=81)** |
|  | | |  | **OR (95% CI)** ᵇ | **OR (95% CI)** ᵇ | **OR (95% CI)** ᵇ | **OR (95% CI)** ᵇ |
| **Parental demographic factors** | | |  |  |  |  |  |
| Maternal education below bachelor level | | |  | 1.43 (0.86-2.38) | 0.80 (0.46-1.40) | 2.05 (0.93-4.52) | 0.77 (0.36-1.64) |
| Maternal work qualification | | Executive or higher intellectual profession | | reference | reference | reference | reference |
|  | | Intermediate profession | | 0.92 (0.44-1.94) | 1.13 (0.61-2.09) | 0.88 (0.35-2.22) | 1.42 (0.64-3.14) |
|  | | Labourer | | 0.86 (0.45-1.67) | 0.77 (0.44-1.36) | 0.53 (0.20-1.36) | 0.72 (0.33-1.57) |
| **Parental characteristics** | | |  |  |  |  |  |
| Maternal age | | |  | 1.07 (0.96-1.19) | 1.06 (0.96-1.17) | 0.98 (0.84-1.15) | 0.99 (0.86-1.15) |
| Maternal pre-conceptional BMI | | |  | 1.11 (0.98-1.25) | 1.04 (0.93-1.17) | 1.10 (0.94-1.28) | 1.09 (0.94-1.25) |
| Mother HAD anxiety score >8 during pregnancy | | | | 1.27 (0.83-1.95) | 1.36 (0.93-2.00) | 1.23 (0.74-2.07) | 1.37 (0.85-2.22) |
| Mother HAD depression score >8 during pregnancy | | | | 0.93 (0.52-1.65) | 1.05 (0.64-1.72) | 0.65 (0.30-1.39) | 0.84 (0.44-1.63) |
| Father HAD anxiety scale>8 during pregnancy | | | | 0.97 (0.57-1.66) | 1.08 (0.70-1.65) | 1.06 (0.54-2.06) | 1.05 (0.61-1.80) |
| Father HAD depression scale>8 during pregnancy | | | | 1.09 (0.40-2.94) | 1.35 (0.58-3.15) | 1.09 (0.30-4.00) | 1.28 (0.41-4.00) |
| Maternal chronotype | | |  | 1.36 (0.69-2.69) | 0.89 (0.48-1.64) | 0.88 (0.27-2.83) | 0.98 (0.31-3.09) |
| Paternal chronotype | | |  | 2.42 (1.34-4.38) | 0.88 (0.51-1.49) | 2.53 (0.91-7.04) | 0.75 (0.29-1.95) |
| Maternal weekday nap during 3 months postpartum | | | | 1.28 (0.84-1.96) | 1.32 (0.90-1.93) | 1.84 (1.05-3.20) | 3.04 (1.72-5.38) |
| **Child characteristics** | | |  |  |  |  |  |
| First child | | |  | 0.27 (0.12-0.61) | 0.56 (0.28-1.12) | 0.47 (0.27-0.80) | 0.76 (0.48-1.23) |
| Boy | | |  | 1.05 (0.49-2.24) | 1.24 (0.62-2.47) | 0.82 (0.49-1.37) | 0.82 (0.51-1.33) |
| Gestation age (weeks) | | |  | 0.92 (0.70-1.20) | 0.93 (0.73-1.19) | 0.91 (0.60-1.38) | 0.91 (0.62-1.32) |
| Birth weight (kg) | | |  | 1.64 (0.64-4.21) | 1.35 (0.58-3.15) | 1.72 (0.37-8.04) | 1.61 (0.40-6.48) |
| Child birth seasonality | Spring | | | 1.31 (0.42-4.13) | 1.08 (0.36-3.29) | 1.06 (0.42-2.64) | 0.78 (0.33-1.82) |
|  | Summer | | | reference | reference | reference | reference |
|  | Autumn | | | 0.49 (0.19-1.29) | 0.69 (0.29-1.66) | 0.49 (0.23-1.03) | 0.78 (0.41-1.49) |
|  | Winter | | | 1.09 (0.34-3.54) | 1.75 (0.61-5.04) | 1.89 (0.74-4.81) | 1.50 (0.65-3.49) |
| Breastfeeding <26 weeks | | |  | 0.89 (0.60-1.31) | 0.92 (0.65-1.31) | 1.04 (0.64-1.68) | 1.05 (0.67-1.65) |

ᵃ C1: Long NSD, short DSD and low SSL; C2: Shortest NSD and DSD, highest SSL; C3: Long NSD and DSD, moderate SSL

ᵇ Odds ratio (OR) and 96% confidence interval (95% CI).

NSD: Nighttime sleep duration; DSD: Daytime sleep duration; SSL: subjective sleep loss
